# Supplementary material for: Assessment of Mastitis Patterns in Serbian Dairy Cows: Blood Serum Metabolic Profile and Milk Composition Parameters
Source: MDPI journal article supplement (doi:10.3390/pathogens12111349), 2023-11-14
Supplement: s1 [file s1]

Table S1. One-way ANOVA of blood serum biochemical parameters and milk composition parameters.

|                    | Test of SS Whole Model vs. SS Residual |                         |                         |           |          |           |             |             |             |          |          |
|--------------------|----------------------------------------|-------------------------|-------------------------|-----------|----------|-----------|-------------|-------------|-------------|----------|----------|
| Dependent Variable | Multiple R                             | Multiple R <sup>2</sup> | Adjusted R <sup>2</sup> | SS Model  | df Model | MS Model  | SS Residual | df Residual | MS Residual | F        | P        |
| Total protein      | 0.657282                               | 0.432019                | 0.412766                | 2562      | 2        | 1281      | 3369        | 59          | 57          | 22.43840 | 0.000000 |
| Albumin            | 0.435304                               | 0.189489                | 0.162014                | 185       | 2        | 93        | 792         | 59          | 13          | 6.89680  | 0.002034 |
| Globulin           | 0.753312                               | 0.567479                | 0.552817                | 4162      | 2        | 2081      | 3172        | 59          | 54          | 38.70475 | 0.000000 |
| Total bilirubin    | 0.653856                               | 0.427528                | 0.408122                | 268       | 2        | 134       | 358         | 59          | 6           | 22.03089 | 0.000000 |
| AST                | 0.355478                               | 0.126364                | 0.096750                | 15032     | 2        | 7516      | 103923      | 59          | 1761        | 4.26694  | 0.018588 |
| GGT                | 0.467406                               | 0.218468                | 0.191976                | 1287      | 2        | 643       | 4604        | 59          | 78          | 8.24639  | 0.000695 |
| Glucose            | 0.120537                               | 0.014529                | -0.018877               | 0         | 2        | 0         | 9           | 59          | 0           | 0.43493  | 0.649368 |
| Ca                 | 0.237345                               | 0.056333                | 0.024344                | 0         | 2        | 0         | 6           | 59          | 0           | 1.76101  | 0.180784 |
| P                  | 0.127723                               | 0.016313                | -0.017032               | 3         | 2        | 2         | 194         | 59          | 3           | 0.48922  | 0.615569 |
| Urea               | 0.498419                               | 0.248422                | 0.222945                | 50        | 2        | 25        | 153         | 59          | 3           | 9.75074  | 0.000219 |
| Triglyceride       | 0.602465                               | 0.362964                | 0.341370                | 2         | 2        | 1         | 4           | 59          | 0           | 16.80823 | 0.000002 |
| BHB                | 0.477489                               | 0.227996                | 0.201826                | 1         | 2        | 0         | 3           | 59          | 0           | 8.71221  | 0.000484 |
| Mg                 | 0.419342                               | 0.175848                | 0.147910                | 1         | 2        | 1         | 6           | 59          | 0           | 6.29436  | 0.003328 |
| ALP                | 0.484907                               | 0.235135                | 0.209208                | 10801     | 2        | 5401      | 35135       | 59          | 596         | 9.06891  | 0.000368 |
| ALT                | 0.633106                               | 0.400823                | 0.380512                | 2682      | 2        | 1341      | 4009        | 59          | 68          | 19.73420 | 0.000000 |
| Creatinine         | 0.519922                               | 0.270319                | 0.245584                | 8588      | 2        | 4294      | 23183       | 59          | 393         | 10.92865 | 0.000092 |
| LDH                | 0.779785                               | 0.608065                | 0.594779                | 7368028   | 2        | 3684014   | 4749141     | 59          | 80494       | 45.76761 | 0.000000 |
| NEFA               | 0.546396                               | 0.298549                | 0.274771                | 1         | 2        | 0         | 2           | 59          | 0           | 12.55566 | 0.000029 |
| Milk fat (%)       | 0.497129                               | 0.247137                | 0.221616                | 189       | 2        | 94        | 575         | 59          | 10          | 9.68375  | 0.000231 |
| Milk protein (%)   | 0.509335                               | 0.259422                | 0.234318                | 5         | 2        | 3         | 14          | 59          | 0           | 10.33375 | 0.000142 |
| Lactose (%)        | 0.590661                               | 0.348881                | 0.326809                | 11        | 2        | 6         | 21          | 59          | 0           | 15.80659 | 0.000003 |
| SCC (*1000/mL)     | 0.644543                               | 0.415436                | 0.395620                | 656947106 | 2        | 328473553 | 924395825   | 59          | 15667726    | 20.96498 | 0.000000 |
| CFU (CFU*1000/mL)  | 0.438073                               | 0.191908                | 0.164515                | 7830882   | 2        | 3915441   | 32974477    | 59          | 558889      | 7.00575  | 0.001862 |
| Casein             | 0.472489                               | 0.223245                | 0.196915                | 2         | 2        | 1         | 6           | 59          | 0           | 8.47853  | 0.000580 |
| Urea (mg/dl)       | 0.280555                               | 0.078711                | 0.047481                | 1627      | 2        | 813       | 19041       | 59          | 323         | 2.52035  | 0.089059 |
| BHB (mmol/l)       | 0.408835                               | 0.167146                | 0.138914                | 1         | 2        | 0         | 3           | 59          | 0           | 5.92038  | 0.004537 |
| Acetone (mmol/l)   | 0.119219                               | 0.014213                | -0.019203               | 0         | 2        | 0         | 2           | 59          | 0           | 0.42533  | 0.655539 |
| LDH (IU/L)         | 0.660746                               | 0.436585                | 0.417486                | 10472805  | 2        | 5236402   | 13515211    | 59          | 229071      | 22.85926 | 0.000000 |

Table S2. PCA results – blood serum biochemical parameters.

a) PCA Loadings.

| Variable        | Factor Loadings (Varimax normalized) Extraction: Principal components |           |
|-----------------|-----------------------------------------------------------------------|-----------|
|                 | Factor 1                                                              | Factor 2  |
| Total protein   | 0.591474                                                              | -0.536983 |
| Albumin         | -0.052621                                                             | 0.721027  |
| Globulin        | 0.560219                                                              | -0.678787 |
| Total bilirubin | 0.605705                                                              | -0.247423 |
| AST             | 0.665653                                                              | 0.219627  |
| GGT             | 0.522233                                                              | 0.008121  |
| Glucose         | -0.140780                                                             | -0.287939 |

|              |           |           |
|--------------|-----------|-----------|
| Ca           | -0.036026 | 0.203117  |
| P            | -0.001395 | -0.187055 |
| Urea         | 0.724719  | 0.431964  |
| Triglyceride | -0.449751 | 0.264523  |
| BHB          | 0.780976  | 0.126675  |
| Mg           | 0.367781  | -0.065564 |
| ALP          | 0.361263  | -0.319133 |
| ALT          | -0.255037 | 0.714829  |
| Creatinine   | -0.030606 | 0.516182  |
| LDH          | 0.701030  | -0.210673 |
| NEFA         | 0.644636  | -0.248346 |
| Expl. Var    | 4.346446  | 2.799897  |
| Prp. Totl    | 0.241469  | 0.155550  |

b) Eigenvalues.

| Value | Eigenvalues; Extraction: Principal components |                  |                       |              |
|-------|-----------------------------------------------|------------------|-----------------------|--------------|
|       | Eigenvalue                                    | % Total variance | Cumulative Eigenvalue | Cumulative % |
| 1     | 4.880449                                      | 27.11360         | 4.880449              | 27.11360     |
| 2     | 2.265895                                      | 12.58830         | 7.146343              | 39.70191     |

c) PCA scores.

| Case | Factor Scores; Rotation: Varimax normalized; Extraction: Principal components |                     |                       |                   |
|------|-------------------------------------------------------------------------------|---------------------|-----------------------|-------------------|
|      | Factor 1                                                                      | Factor 2 - Clinical | Factor 2- Subclinical | Factor 2- Healthy |
| 1    | 0.11716                                                                       | -2.33033            |                       |                   |
| 2    | 0.16863                                                                       | -0.20569            |                       |                   |
| 3    | 0.56202                                                                       | -1.44194            |                       |                   |
| 4    | 0.05045                                                                       | -1.36273            |                       |                   |
| 5    | -0.16992                                                                      | -1.49105            |                       |                   |
| 6    | 0.47760                                                                       | -0.82948            |                       |                   |
| 7    | -0.14839                                                                      | -0.71128            |                       |                   |
| 8    | 0.90815                                                                       | -0.31669            |                       |                   |
| 9    | 0.34187                                                                       | -1.63744            |                       |                   |
| 10   | -0.17806                                                                      | -2.82698            |                       |                   |
| 11   | 1.90116                                                                       | -0.29190            |                       |                   |
| 12   | 1.54412                                                                       | -0.42443            |                       |                   |
| 13   | 1.49317                                                                       | 0.20380             |                       |                   |
| 14   | 2.01304                                                                       | 0.73855             |                       |                   |
| 15   | 1.17281                                                                       | 0.28178             |                       |                   |
| 16   | 2.46361                                                                       | 1.20504             |                       |                   |
| 17   | 3.12501                                                                       | 2.14334             |                       |                   |
| 18   | 0.72303                                                                       | -1.46503            |                       |                   |
| 19   | 1.06070                                                                       | -0.46384            |                       |                   |

|    |          |          |          |          |
|----|----------|----------|----------|----------|
| 20 | 1.24090  | -0.54091 |          |          |
| 21 | 1.02980  | -0.87190 |          |          |
| 22 | 1.63043  | -0.17970 |          |          |
| 23 | 1.05438  | -0.45569 |          |          |
| 24 | -0.27462 |          | -0.74608 |          |
| 25 | -0.34208 |          | 0.20898  |          |
| 26 | -0.83589 |          | -0.09316 |          |
| 27 | 0.53472  |          | 0.33632  |          |
| 28 | -0.07542 |          | 0.74193  |          |
| 29 | -0.62734 |          | -0.53911 |          |
| 30 | -0.94728 |          | -0.30050 |          |
| 31 | -1.27264 |          | -0.92496 |          |
| 32 | 0.26967  |          | -0.63318 |          |
| 33 | -0.04166 |          | 0.50956  |          |
| 34 | -1.10664 |          | -0.29568 |          |
| 35 | -0.50175 |          | 0.47001  |          |
| 36 | -0.65321 |          | -0.87175 |          |
| 37 | 0.42657  |          | 1.01663  |          |
| 38 | -0.50802 |          | 0.44348  |          |
| 39 | -0.47291 |          | -0.31600 |          |
| 40 | -0.67642 |          | -0.12949 |          |
| 41 | -0.88774 |          | -0.82156 |          |
| 42 | -1.34525 |          | -1.03841 |          |
| 43 | 0.68777  |          | 0.47086  |          |
| 44 | -0.98460 |          |          | 0.20487  |
| 45 | -0.91445 |          |          | 0.87125  |
| 46 | -0.95123 |          |          | 0.87448  |
| 47 | -0.98825 |          |          | 1.37779  |
| 48 | -0.51105 |          |          | 1.39058  |
| 49 | -1.09052 |          |          | -0.45237 |
| 50 | -0.64894 |          |          | 1.00763  |
| 51 | -0.18020 |          |          | 0.56458  |
| 52 | -0.18537 |          |          | 2.29503  |
| 53 | -0.81932 |          |          | 0.39243  |
| 54 | -0.70057 |          |          | 0.97426  |
| 55 | -0.37987 |          |          | 0.61244  |
| 56 | -0.59261 |          |          | 0.73034  |
| 57 | -0.56342 |          |          | 0.52722  |
| 58 | -0.65921 |          |          | 0.52444  |
| 59 | -0.99803 |          |          | 0.43412  |
| 60 | -1.04262 |          |          | 1.54875  |
| 61 | -0.94819 |          |          | 1.08036  |
| 62 | -0.77309 |          |          | 0.82845  |

Table S3. PCA results – milk composition parameters.

a) PCA loadings.

| Variable                     | PCA loadings   |             |             |
|------------------------------|----------------|-------------|-------------|
|                              | Category value | Component 1 | Component 2 |
| Milk fat (%)                 |                | 0.505820    | 0.639217    |
| Milk protein (%)             |                | 0.703483    | 0.076944    |
| Lactose (%)                  |                | -0.759569   | 0.345575    |
| SCC (*1000/mL)               |                | 0.684450    | -0.250515   |
| CFU (CFU*1000/mL)            |                | 0.564019    | -0.417851   |
| Casein                       |                | 0.476658    | 0.602306    |
| Urea (mg/dl)                 |                | 0.323144    | 0.653459    |
| BHB (mmol/l)                 |                | 0.656735    | -0.289406   |
| Acetone (mmol/l)             |                | 0.222583    | -0.610712   |
| LDH (IU/L)                   |                | 0.673746    | 0.060271    |
| Group {Clinical mastitis}    | 1              | 0.771779    | -0.194688   |
| Group {Subclinical mastitis} | 2              | -0.061064   | 0.548596    |
| Group {Healthy}              | 3              | -0.746765   | -0.352268   |

b) Eigenvalues.

| Component | Principal Components Analysis Eigenvalues |                  |                       |              |
|-----------|-------------------------------------------|------------------|-----------------------|--------------|
|           | Eigenvalues                               | % Total variance | Cumulative eigenvalue | Cumulative % |
| 1         | 4.537710                                  | 34.90546         | 4.537710              | 34.90546     |
| 2         | 2.484391                                  | 19.11070         | 7.022101              | 54.01616     |

c) PCA scores.

|    | Scores      |             |
|----|-------------|-------------|
|    | Component 1 | Component 2 |
| 1  | 1.46414     | -0.34514    |
| 2  | 0.30796     | 0.48298     |
| 3  | -1.24428    | -1.12743    |
| 4  | 1.62115     | -1.87718    |
| 5  | 1.25712     | -2.17232    |
| 6  | 4.78921     | -1.00896    |
| 7  | 2.54269     | -0.58541    |
| 8  | 2.64595     | -2.60884    |
| 9  | 3.97430     | -3.19097    |
| 10 | 4.24618     | -3.31851    |
| 11 | 1.29574     | 2.20331     |
| 12 | 1.21916     | 0.39009     |
| 13 | 0.89607     | -0.66562    |
| 14 | 1.64667     | 0.92032     |
| 15 | 4.99866     | -1.96909    |

|    |          |          |
|----|----------|----------|
| 16 | 1.46853  | 2.47929  |
| 17 | 2.52341  | 1.19844  |
| 18 | 3.05029  | 3.39264  |
| 19 | 2.63753  | 3.06646  |
| 20 | 0.50940  | -0.63449 |
| 21 | 0.81596  | -0.28327 |
| 22 | 3.97373  | -2.37412 |
| 23 | 2.25736  | -1.14751 |
| 24 | -1.13709 | 1.00287  |
| 25 | 0.05829  | 0.70966  |
| 26 | -1.00257 | 1.07978  |
| 27 | -0.46351 | 1.39271  |
| 28 | -1.21376 | 0.90690  |
| 29 | -0.55323 | 0.86729  |
| 30 | -0.35252 | 1.99174  |
| 31 | -1.32018 | 0.89403  |
| 32 | 0.49674  | 1.27413  |
| 33 | 0.69387  | -0.23623 |
| 34 | 0.50663  | 3.25410  |
| 35 | 1.25179  | 2.37414  |
| 36 | 1.03569  | 1.44782  |
| 37 | -0.15588 | 1.97843  |
| 38 | -0.26597 | 0.38496  |
| 39 | -0.39455 | 2.13771  |
| 40 | -0.06428 | 1.63956  |
| 41 | -0.85887 | 0.89454  |
| 42 | -0.21320 | -0.26676 |
| 43 | 0.05709  | 0.98621  |
| 44 | -1.97548 | -0.05129 |
| 45 | -2.55343 | -0.73241 |
| 46 | -2.58305 | -1.31105 |
| 47 | -1.61464 | -0.36660 |
| 48 | -2.11798 | -0.61803 |
| 49 | -2.67345 | -0.80849 |
| 50 | -1.86473 | -0.23285 |
| 51 | -2.81860 | -1.83368 |
| 52 | -1.82908 | -2.61075 |
| 53 | -2.62151 | -0.80658 |
| 54 | -2.44149 | -1.65284 |
| 55 | -2.64113 | -1.42254 |
| 56 | -2.88779 | -1.22842 |
| 57 | -2.41559 | -0.27256 |
| 58 | -1.93984 | 0.08483  |
| 59 | -2.07570 | 0.03031  |

|    |          |          |
|----|----------|----------|
| 60 | -2.76793 | -0.82476 |
| 61 | -2.94438 | -0.86825 |
| 62 | -2.23562 | -0.01229 |
